# Supplementary material for: Novel Binding Mechanisms of Fusion Broad Range Anti-Infective Protein Ricin A Chain Mutant-Pokeweed Antiviral Protein 1 (RTAM-PAP1) against SARS-CoV-2 Key Proteins in Silico
Source: MDPI journal article supplement (doi:10.3390/toxins12090602), 2020-09-17
Supplement: s1 [file s1]

# Supplementary Materials: Novel Binding Mechanisms of Fusion Broad Range Anti-Infective Protein Ricin A Chain Mutant-Pokeweed Antiviral Protein 1 (RTAM-PAP1) against SARS-CoV-2 Key Proteins in Silico

Yasser Hassan, Sherry Ogg and Hui Ge

## Ligand binding sites

| Click to view | Rank | C-score | Cluster size | PDB Hit               | Lig Name            | Download Complex                          | Ligand Binding Site Residues                                         |
|---------------|------|---------|--------------|-----------------------|---------------------|-------------------------------------------|----------------------------------------------------------------------|
|               | 1    | 0.59    | 138          | <a href="#">3px9X</a> | <a href="#">JP3</a> | <a href="#">Rep.</a> <a href="#">Mult</a> | 80,81,82,122,123,124,173,177,178,181,210                             |
|               | 2    | 0.05    | 22           | <a href="#">1pagB</a> | <a href="#">FMP</a> | <a href="#">Rep.</a> <a href="#">Mult</a> | 360,361,409,410,411,459,467,493                                      |
|               | 3    | 0.04    | 13           | <a href="#">1ogIA</a> | <a href="#">NAG</a> | <a href="#">Rep.</a> <a href="#">Mult</a> | 227,230                                                              |
|               | 4    | 0.03    | 7            | <a href="#">1j1mA</a> | <a href="#">TRE</a> | <a href="#">Rep.</a> <a href="#">Mult</a> | 14,15,16,66,142,143,146,147,196,198                                  |
|               | 5    | 0.02    | 4            | <a href="#">3hioA</a> | <a href="#">C2X</a> | <a href="#">Rep.</a> <a href="#">Mult</a> | 76,79,80,81,82,96,97,101,122,124,125,173,177,178,181,212,213,214,259 |

[Download](#) the residue-specific ligand binding probability, which is estimated by SVM.

[Download](#) the all possible binding ligands and detailed prediction summary.

[Download](#) the templates clustering results.

(a) **C-score** is the confidence score of the prediction. C-score ranges [0-1], where a higher score indicates a more reliable prediction.

(b) **Cluster size** is the total number of templates in a cluster.

(c) **Lig Name** is name of possible binding ligand. Click the name to view its information in [the BioLiP database](#).

(d) **Rep** is a single complex structure with the most representative ligand in the cluster, i.e., the one listed in the **Lig Name** column.

**Mult** is the complex structures with all potential binding ligands in the cluster.

## Enzyme Commission (EC) numbers and active sites

| Click to view | Rank | Cscore <sup>EC</sup> | PDB Hit               | TM-score | RMSD <sup>a</sup> | IDEN <sup>a</sup> | Cov   | EC Number                | Active Site Residues |
|---------------|------|----------------------|-----------------------|----------|-------------------|-------------------|-------|--------------------------|----------------------|
|               | 1    | 0.603                | <a href="#">1br6A</a> | 0.479    | 1.15              | 0.978             | 0.485 | <a href="#">3.2.2.22</a> | 178,181              |
|               | 2    | 0.495                | <a href="#">1d6aA</a> | 0.475    | 0.46              | 1.000             | 0.476 | <a href="#">3.2.2.22</a> | 464,467              |
|               | 3    | 0.492                | <a href="#">2v1cA</a> | 0.473    | 3.22              | 0.293             | 0.516 | <a href="#">3.2.2.22</a> | 178,181              |
|               | 4    | 0.490                | <a href="#">2gesA</a> | 0.471    | 0.71              | 0.770             | 0.474 | <a href="#">3.2.2.22</a> | 464,467              |
|               | 5    | 0.489                | <a href="#">3h5kA</a> | 0.470    | 0.89              | 0.755             | 0.474 | <a href="#">3.2.2.22</a> | 464,467              |

**Figure S1.** RTAM-PAP1 active sites. RTAM-PAP1 active sites as determined previously by I-TASSER based on the generated 3D model for RTAM-PAP1. The active sites were used to generate the HADDOCK2.2 and ZDOCK models of RTAM-PAP1 in complex with M.
